# Supplementary material for: Structural motifs for subtype-specific pH-sensitive gating of vertebrate otopetrin proton channels
Source: eLife. 2022 Aug 3;11:e77946. doi: 10.7554/eLife.77946 (PMC9348849; doi:10.7554/eLife.77946)
Supplement: Figure 1—source data 1. [file elife-77946-fig1-data1.xlsx]

## Sheet: Figure 1C
OTOP1
Cell #	10	9	8	7	6	5.5	5	4.5
1	123.9	84.4	-0.9	-17.7	-216.4
2	68.1	64.9	-14.6	-3.7	-126.8		-813.9
3	25.8	21.2	-6.7	-1.1	-75.7		-804.8
4	182.2	110.4	11.7	-8.7	-216.1
5	52.5	24.1	-20	-6.7	-141	-487	-1038.1	-948
6					-101	-303	-719	-1399
7					-87	-292	-904	-1187
8					-219	-589	-1048	-975
9					-184	-689	-749	-1629
10					-297	-600
OTOP2
Cell #	10	9	8	7	6	5.5	5	4.5
1	276.1	129.5	35	-15.9	-155.1		-211.1
2	91.4	38.9	-22.6	-39.1	-156.8		-209.4
3	457.1	353.4	84.2	-53.9	-243.9		-326.3
4	246.7	172.6	35.8	-14.8	-209.7		-341.8
5	237.1	115.7	17.6	-7.9	-64.2		-86.7
6	535.5	238.4	-151.8	-303.2	-948.6		-986.9
7					-67.4	-89	-78	-82
8					-326	-300	-272	-272
9					-232	-255	-213	-282
10					-462	-438	-477	-640
OTOP3
Cell #	10	9	8	7	6	5.5	5	4.5
1	0.2	-0.1	-1	1.6	1.1		-169
2	0.1	-0.2	-0.8	-1.1	-1		-185.8
3	-0.8	-0.5	-0.3	-1.4	-0.8		-448.9
4	-0.3	-1.1	-1	-0.6	-3.7		-717.4
5	0.8	0.8	-0.3	0	-1.5		-629.5
6					-4.6	-61	-570	-1851
7					-9	-151	-736	-1562
8					-7	-283	-983	-1864
9					-14	-162	-650	-1240
Untrans
Cell #	10	9	8	7	6	5.5	5	4.5
1	-9.8	-6	-4.1	-0.6	-1.2		1.2
2	-0.1	0.1	-0.3	0.2	-1.3		-2.3
3	2.3	1.5	0.6	-0.6	1.7		-1.7
4	-9.8	-6	-4.1	-0.6	-1.2		1.2
5	-0.1	0.1	-0.3	0.2	-6	-4.1	-0.6	-1.2
6	2.3	1.5	0.6	-0.6	0.1	-0.3	0.2	-1.3
7					1.5	0.6	-0.6	1.7
8					-6	-4.1	-0.6	-1.2
9					0.1	-0.3	0.2	-1.3
10					1.5	0.6	-0.6	1.7
