# Supplementary material for: Structural motifs for subtype-specific pH-sensitive gating of vertebrate otopetrin proton channels
Source: eLife. 2022 Aug 3;11:e77946. doi: 10.7554/eLife.77946 (PMC9348849; doi:10.7554/eLife.77946)
Supplement: Figure 2—source data 1. [file elife-77946-fig2-data1.xlsx]

## Sheet: Figure 2B
Erev of OTOP2
pHi = 6.0
	ΔpH
Cell #	-1	-0.5	0	0.5	1
1		-30	0	28
2		-29	1	29
3		-29	-1	33
4		-30	4	28
5		-30
pHi = 6.5
	ΔpH
Cell #	-1	-0.5	0	0.5	1
1	-52	-35	2	27	63
2	-59	-31	-1	29
3	-58	-27	2	32	51
4	-57	-30	1	31	63
5	-58	-36	4	31	55
6	-58	-27	0	25	49
7	-60	-28	1	31	45
8			2
9			1
10			-4
11			0
12			-6
pHi = 7.0
	ΔpH
Cell #	-1	-0.5	0	0.5	1
1		-28	4	31
2		-29	-1	26
3		-27	1	30
4		-19	-1	21
5		-27	0	27

## Sheet: Figure 2C
Zn2+ block OTOP2 dose-dependently
	Zn2+ concentration(μM)
Cell #	0.001	0.01	1	10	30	1000	3000	10000
1	0.117955	0.188121	0.349975	0.560674	0.726179
2	0.128373	0.189928	0.412535	0.616808	0.811024
3	0.106267	0.190476	0.390481	0.604943	0.797642
4				0.899645	0.883036	1.11122	1.0758	1.03891
5						1.03793	1.06972	1.06112
6						0.968742	0.99856	0.97365
