# Supplementary material for: Structural motifs for subtype-specific pH-sensitive gating of vertebrate otopetrin proton channels
Source: eLife. 2022 Aug 3;11:e77946. doi: 10.7554/eLife.77946 (PMC9348849; doi:10.7554/eLife.77946)
Supplement: Figure 3—source data 1. [file elife-77946-fig3-data1.xlsx]

## Sheet: Figure 3A_D
OTOP1									OTOP2									OTOP3													pHluorin
Normalized response									Normalized response									Normalized response													Normalized response
Time (s)	Cell 1	Cell 2	Cell 3	Cell 4	Cell 5	Cell 6	Cell 7		Time (s)	Cell 1	Cell 2	Cell 3	Cell 4	Cell 5	Cell 6	Cell 7		Time (s)	Cell 1	Cell 2	Cell 3	Cell 4	Cell 5	Cell 6	Cell 7	Cell 8	Cell 9	Cell 10	Cell 11		Time (s)	Cell 1	Cell 2	Cell 3
0	1	1	1	1	1	1	1		0	1	1	1	1	1	1	1		0	1	1	1	1	1	1	1	1	1	1	1		0	1	1	1
5	0.989369	0.99978	0.999027	1.00537	1.00091	1.00036	1.01361		5	0.99718	1.00473	1.00405	1.00696	0.996597	0.987825	1.00459		5	1.00758	1.00558	1.00471	1.00074	1.0064	0.9999	1.00666	1.00446	0.997858	0.999009	1.00841		5	0.997478	1.00704	1
10	0.999275	0.99505	1.00049	1.02203	0.997055	1.01619	1.03118		10	0.998993	1.00683	1.00512	1.01671	0.997164	1.00645	1.01518		10	0.996685	1.00791	1.00147	1.00059	1.00078	1.0024	1.00561	0.993308	0.999286	1	0.986973		10	1	0.995096	0.995796
15	0.986712	0.98856	1.00146	1.018	1.00272	1.0201	1.02182		15	0.997583	1.00328	1.0032	1.01253	0.997306	1.00692	1.01857		15	0.989581	1.00198	0.994896	0.988327	0.992891	0.98809	0.993811	0.982155	0.980957	0.983156	0.971294		15	0.967849	0.981023	0.978487
20	0.989611	0.98196	0.991004	1.02364	0.992299	1.02153	1.01814		20	0.989728	0.990025	0.989974	0.997017	0.985961	0.995464	1.01019		20	0.981664	0.994769	0.990577	0.980496	0.985639	0.984788	0.993927	0.975686	0.975244	0.97944	0.95804		20	0.942002	0.944563	0.946588
25	0.979464	0.97206	0.981279	1.01908	1.00181	1.02242	1.02041		25	0.9857	0.983069	0.983148	0.987868	0.980431	0.992361	1.01757		25	0.985589	0.995234	0.991362	0.977098	0.984075	0.980785	0.986337	0.974124	0.974054	0.972504	0.968265		25	0.917573	0.93049	0.926063
30	0.97584	0.96975	0.986385	1.02391	0.993884	1.02597	1.02749		30	0.993152	0.977031	0.981229	0.981901	0.976602	0.988303	1.01578		30	0.986062	0.995001	0.988221	0.984929	0.986066	0.983987	0.988322	0.967656	0.966675	0.965073	0.972961		30	0.888574	0.902985	0.908754
35	0.975598	0.97019	0.983224	1.02311	0.993658	1.0322	1.02863		35	0.973615	0.970862	0.973123	0.966587	0.957175	0.957508	1.00539		35	0.985453	0.990119	0.991657	0.989953	0.989834	0.982086	0.984118	0.973455	0.970483	0.978449	0.980005		35	0.874232	0.895096	0.886499
40	0.970041	0.96073	0.985169	1.03117	0.989581	1.03736	1.01984		40	0.976234	0.968894	0.975043	0.976134	0.959161	0.965147	1.01318		40	0.979432	0.989537	0.977424	0.97828	0.980236	0.977182	0.981899	0.967433	0.970959	0.957394	0.975536		40	0.888258	0.896802	0.907765
45	0.976806	0.95644	0.977875	1.02875	0.990713	1.04341	1.02381		45	0.982477	0.991731	0.991681	0.993238	0.974192	0.987348	1.03575		45	0.980785	0.983957	0.974971	0.986259	0.986919	0.977082	0.981549	0.962525	0.963818	0.953431	0.975839		45	0.8974	0.911301	0.921118
50	0.961585	0.9593	0.973742	1.03117	0.993658	1.05693	1.02948		50	0.98711	0.999869	1.00853	1.01372	0.985252	0.993077	1.04514		50	0.980176	0.976517	0.976737	0.978428	0.989123	0.982386	0.974542	0.962748	0.960962	0.961357	0.978717		50	0.907013	0.93049	0.949555
55	0.965692	0.95149	0.967177	1.03385	0.992752	1.05978	1.03345		55	0.988318	1.00171	1.00427	1.01611	0.986245	1.00692	1.06111		55	0.986604	0.983957	0.980075	0.976359	0.994313	0.979283	0.980381	0.96654	0.965008	0.959128	0.97902		55	0.92041	0.955437	0.948318
60	0.967142	0.949181	0.968636	1.04299	0.987995	1.07365	1.04167		60	0.990332	1.00092	1.00683	1.01671	0.986387	1.0117	1.06072		60	0.99046	0.978842	0.970357	0.974882	0.999573	0.979283	0.972556	0.96654	0.959295	0.965816	0.972506		60	0.928448	0.960128	0.953511
65	0.955786	0.943461	0.956236	1.05347	0.981653	1.08095	1.03203		65	0.989728	1.00092	1.00597	1.02049	0.989648	1.02125	1.0709		65	0.985115	0.980121	0.975559	0.974143	0.996374	0.978983	0.970221	0.967433	0.959771	0.960119	0.970764		65	0.937431	0.972708	0.966617
70	0.95482	0.941261	0.954048	1.05105	0.981653	1.08628	1.03855		70	0.988922	0.999081	1.00213	1.01631	0.992626	1.03461	1.0737		70	0.986671	0.98326	0.974872	0.973109	1.0027	0.976882	0.971272	0.969217	0.962628	0.965816	0.968946		70	0.941056	0.979104	0.972305
75	0.956994	0.939611	0.954778	1.06878	0.980068	1.10834	1.06463		75	0.992951	0.995931	1.00491	1.0169	0.989081	1.03891	1.07469		75	0.986874	0.983492	0.979584	0.97104	1.00533	0.978883	0.969286	0.96654	0.959295	0.958137	0.960842		75	0.936643	0.976759	0.971563
80	0.962551	0.929051	0.953562	1.072	0.971008	1.11884	1.05244		80	0.995569	0.995012	1.0064	1.00756	0.984969	1.03772	1.06491		80	0.984032	0.97768	0.977326	0.970892	1.0005	0.976982	0.971155	0.957172	0.953821	0.956899	0.960085		80	0.912057	0.956503	0.961177
85	0.975356	0.938401	0.971067	1.0798	0.994111	1.16421	1.06944		85	1.00101	1.07914	1.13695	1.13803	1.02439	1.08212	1.09127		85	0.988769	0.983608	0.989105	0.976359	1.01024	0.985488	0.980614	0.962748	0.95144	0.976715	0.960691		85	0.893144	0.940299	0.944115
90	1.01643	0.942141	0.989059	1.10263	1.03194	1.21491	1.09495		90	1.10272	1.4351	1.47803	1.48548	1.23072	1.25376	1.16297		90	0.99276	0.985817	0.994503	0.974586	1.00889	0.989291	0.978279	0.965871	0.944537	0.971761	0.951753		90	0.872498	0.916844	0.918398
95	1.04687	0.944011	1.00608	1.11472	1.05595	1.26846	1.10686		95	1.20201	1.63197	1.6186	1.642	1.37961	1.40224	1.24086		95	0.987145	0.987445	1.00216	0.978576	1.02225	0.984988	0.977928	0.963194	0.955963	0.960367	0.960691		95	0.862096	0.914499	0.91815
100	1.06765	0.95248	1.01702	1.13944	1.0761	1.32521	1.12217		100	1.29567	1.72162	1.66809	1.71341	1.46256	1.52757	1.30737		100	0.983965	0.988259	1.01001	0.985816	1.02439	0.98749	0.977461	0.966094	0.948346	0.971761	0.960464		100	0.85658	0.919616	0.915925
105	1.08939	0.95567	1.02991	1.1518	1.09626	1.38071	1.14626		105	1.36677	1.7459	1.69475	1.75139	1.49929	1.61661	1.36629		105	0.990663	0.993257	1.02051	0.99143	1.02794	0.989091	0.981315	0.968548	0.961438	0.973743	0.968265		105	0.85989	0.923454	0.920376
110	1.11645	0.95842	1.04887	1.16873	1.11076	1.42572	1.17007		110	1.43605	1.77123	1.70563	1.74881	1.52538	1.68489	1.40883		110	0.989513	0.996396	1.03013	0.995272	1.03853	0.993795	0.986103	0.970555	0.956677	0.973743	0.968795		110	0.870449	0.949254	0.931009
115	1.13047	0.95985	1.06686	1.17894	1.13839	1.4807	1.16979		115	1.4856	1.79079	1.7227	1.78262	1.5536	1.74051	1.44418		115	0.99134	0.994885	1.02797	0.998818	1.03725	1	0.989957	0.973455	0.954535	0.978697	0.959555		115	0.8829	0.95629	0.949308
120	1.14158	0.96491	1.07732	1.20554	1.15606	1.51841	1.18311		120	1.53072	1.80457	1.73741	1.78819	1.57657	1.78611	1.46415		120	0.985859	0.994885	1.03592	0.99409	1.04194	0.999299	0.99019	0.97524	0.955011	0.972752	0.960312		120	0.884949	0.968657	0.967606
125	1.15342	0.96414	1.0868	1.22165	1.17146	1.56591	1.19331		125	1.55468	1.80667	1.73933	1.80271	1.59614	1.8021	1.47933		125	0.985386	0.987096	1.03504	0.990544	1.04465	0.998599	0.991475	0.978586	0.942395	0.976468	0.952889		125	0.876438	0.962473	0.958704
130	1.16332	0.96403	1.09871	1.22622	1.17712	1.61324	1.21145		130	1.59537	1.81992	1.75981	1.82518	1.63301	1.84579	1.50489		130	0.979567	0.986864	1.0319	0.991578	1.0413	1.0006	0.984118	0.979924	0.9393	0.969036	0.939105		130	0.86777	0.963966	0.953017
135	1.17565	0.97173	1.11403	1.24476	1.1966	1.65237	1.22307		135	1.61188	1.81507	1.75405	1.85601	1.6367	1.86751	1.51808		135	0.972598	0.976285	1.0266	0.978428	1.03796	0.994896	0.989023	0.96654	0.935015	0.963587	0.93244		135	0.861151	0.95629	0.948813
140	1.17396	0.97415	1.12643	1.23966	1.21223	1.6828	1.23923		140	1.61893	1.78685	1.72867	1.85123	1.62734	1.86655	1.51748		140	0.970027	0.969774	1.02562	0.981974	1.03796	0.996497	0.979213	0.975686	0.931921	0.958633	0.933046		140	0.848857	0.951599	0.933729
145	1.1812	0.97943	1.12351	1.25954	1.21653	1.72122	1.2432		145	1.62034	1.73605	1.68473	1.8208	1.59699	1.8508	1.51827		145	0.968336	0.980353	1.01914	0.972961	1.03981	0.993895	0.973491	0.976578	0.926446	0.957394	0.932591		145	0.846651	0.955011	0.944115
150	1.18338	0.98427	1.13834	1.27324	1.23171	1.75503	1.25624		150	1.60826	1.70403	1.65742	1.80131	1.57884	1.86178	1.50529		150	0.958051	0.970937	1.0104	0.967199	1.03157	0.98749	0.964148	0.974348	0.923114	0.954669	0.933803		150	0.844287	0.965458	0.94634
155	1.18748	0.98779	1.14053	1.27835	1.24666	1.7842	1.26276		155	1.62054	1.68618	1.61604	1.73906	1.5709	1.85032	1.5001		155	0.960352	0.971751	1.00795	0.968972	1.03064	0.983287	0.962046	0.98037	0.919781	0.949467	0.929864		155	0.839559	0.965245	0.965628
160	1.17927	0.98416	1.14977	1.27861	1.25844	1.81195	1.26729		160	1.56173	1.57422	1.49147	1.60282	1.47745	1.78515	1.42441		160	0.954871	0.967217	1.00442	0.964391	1.02929	0.984087	0.957024	0.973009	0.915734	0.949715	0.940695		160	0.833097	0.955437	0.950791
165	1.19087	0.98702	1.15366	1.29285	1.26297	1.83455	1.2809		165	1.51178	1.4599	1.3863	1.49165	1.40102	1.72738	1.36649		165	0.947497	0.967682	0.999804	0.956413	1.02261	0.979183	0.954105	0.975909	0.919543	0.953183	0.940544		165	0.824901	0.965885	0.952275
170	1.19981	0.99142	1.16314	1.30279	1.27157	1.8591	1.29195		170	1.48338	1.4011	1.33575	1.41607	1.36245	1.66651	1.32455		170	0.943099	0.959893	0.990185	0.953753	1.01905	0.973479	0.951419	0.980816	0.907879	0.953183	0.922821		170	0.820804	0.961407	0.949555
175	1.20271	0.9901	1.1663	1.31757	1.28924	1.88525	1.29649		175	1.44169	1.34388	1.29224	1.35939	1.32402	1.60468	1.30437		175	0.927334	0.945943	0.972713	0.938682	1.00754	0.963971	0.941492	0.969886	0.895025	0.93733	0.910778		175	0.797951	0.958635	0.950791
180	1.20536	1.00121	1.17287	1.31488	1.29151	1.91176	1.31264		180	1.4143	1.30148	1.26003	1.30987	1.29424	1.55216	1.27482		180	0.913396	0.930249	0.955536	0.914303	0.994668	0.947058	0.928413	0.958287	0.879076	0.929651	0.897599		180	0.797006	0.950533	0.947577
185	1.20416	1.00044	1.18332	1.33396	1.30283	1.92546	1.32426		185	1.38651	1.27011	1.22568	1.27526	1.27538	1.51922	1.25385		185	0.902706	0.928389	0.931586	0.902187	0.976895	0.927342	0.915333	0.954049	0.869555	0.918752	0.903734		185	0.77037	0.945203	0.941147
190	1.20585	1.00066	1.18429	1.33503	1.32118	1.94876	1.3339		190	1.36012	1.23205	1.19817	1.23588	1.25539	1.47338	1.24566		190	0.89364	0.91781	0.897821	0.879285	0.954287	0.914632	0.905524	0.942226	0.852654	0.915036	0.892979		190	0.766273	0.941151	0.923096
195	1.20536	1.00275	1.18356	1.33262	1.31733	1.96887	1.33957		195	1.34723	1.19832	1.16894	1.19988	1.22958	1.44307	1.23867		195	0.881664	0.910486	0.859344	0.853576	0.937722	0.891813	0.897466	0.937765	0.836706	0.90488	0.880557		195	0.756659	0.940725	0.925074
200	1.21116	1.00506	1.19791	1.34847	1.32027	1.96976	1.34269		200	1.31964	1.17063	1.14441	1.17403	1.20803	1.40344	1.22209		200	0.87659	0.897117	0.825481	0.829196	0.920375	0.884508	0.887072	0.930181	0.821709	0.892494	0.865258		200	0.752719	0.9371	0.924332
205	1.20561	1.00396	1.19475	1.3439	1.32027	1.98701	1.34864		205	1.29889	1.147	1.11604	1.14638	1.19016	1.36882	1.2113		205	0.870298	0.888979	0.784452	0.802896	0.905232	0.868395	0.877029	0.912559	0.803618	0.8811	0.861698		205	0.752088	0.934115	0.928783
210	1.20802	1.01122	1.19645	1.34712	1.32276	1.9911	1.36111		210	1.28137	1.12325	1.1105	1.1245	1.17087	1.34519	1.19553		210	0.860014	0.877587	0.748135	0.776596	0.885895	0.858987	0.861497	0.907428	0.799095	0.871439	0.856321		210	0.75855	0.942004	0.928042
215	1.21116	1.01034	1.19669	1.34901	1.34156	1.99591	1.36083		215	1.26324	1.10868	1.09002	1.1064	1.15981	1.31798	1.18095		215	0.853248	0.8691	0.707106	0.756501	0.874733	0.841373	0.85811	0.901405	0.779814	0.858311	0.850867		215	0.759023	0.93838	0.917903
220	1.20391	1.00638	1.20301	1.35169	1.33137	1.99288	1.36791		220	1.24874	1.09345	1.0866	1.09924	1.15031	1.29745	1.17176		220	0.845399	0.854685	0.66755	0.730792	0.853619	0.831165	0.85122	0.88646	0.773387	0.845182	0.839127		220	0.758235	0.940085	0.930762
225	1.20295	1	1.20618	1.34686	1.31914	1.98328	1.3665		225	1.22618	1.08098	1.07743	1.08711	1.14265	1.27644	1.17855		225	0.838024	0.845966	0.632018	0.709811	0.836698	0.822158	0.839309	0.886014	0.760533	0.834531	0.837764		225	0.761229	0.941791	0.923096
230	1.20319	0.99197	1.19864	1.33772	1.31823	1.95677	1.37415		230	1.21349	1.07612	1.07167	1.08512	1.12932	1.25901	1.16537		230	0.829567	0.828645	0.600609	0.689716	0.826248	0.806245	0.838958	0.871961	0.755772	0.831806	0.820723		230	0.768006	0.932409	0.917903
235	1.19836	0.97987	1.19524	1.33369	1.30578	1.91212	1.35799		235	1.19335	1.06904	1.06463	1.06424	1.12266	1.25185	1.15139		235	0.824154	0.814229	0.567138	0.660018	0.808048	0.795937	0.829265	0.862815	0.748393	0.822888	0.813527		235	0.760441	0.933689	0.915183
240	1.18555	0.97019	1.17262	1.32214	1.29943	1.88881	1.34609		240	1.17664	1.06759	1.07061	1.06663	1.11188	1.23299	1.1426		240	0.823139	0.79993	0.537888	0.645095	0.801081	0.782326	0.822609	0.856123	0.732921	0.814962	0.808604		240	0.750827	0.928571	0.925321
245	1.17951	0.9582	1.16606	1.31757	1.28471	1.85785	1.33078		245	1.14844	1.01575	0.981015	0.99821	1.08352	1.20983	1.12542		245	0.815765	0.78784	0.512956	0.624557	0.78217	0.772218	0.811982	0.855677	0.731731	0.814218	0.793153		245	0.75855	0.924947	0.919634
250	1.17613	0.949181	1.15171	1.31005	1.28766	1.83828	1.32625		250	1.03202	0.577372	0.542449	0.611177	0.812252	1.02626	1.03954		250	0.809946	0.771681	0.48989	0.610077	0.76596	0.758907	0.810697	0.839839	0.720305	0.80654	0.782777		250	0.752876	0.923667	0.928289
255	1.1684	0.933781	1.15342	1.30602	1.27135	1.81195	1.31576		255	0.885801	0.365009	0.404437	0.442323	0.577567	0.872046	0.883563		255	0.812991	0.759126	0.469768	0.595597	0.754372	0.747998	0.807194	0.832478	0.716258	0.794649	0.773461		255	0.748779	0.922814	0.928783
260	1.16671	0.932131	1.14831	1.30602	1.2641	1.7915	1.30924		260	0.785096	0.292558	0.353882	0.376492	0.471639	0.765338	0.760136		260	0.805007	0.741688	0.450923	0.576832	0.743566	0.740092	0.795399	0.816418	0.710545	0.799108	0.764296		260	0.747045	0.919829	0.91543
265	1.16091	0.926961	1.1364	1.29769	1.25708	1.77211	1.2945		265	0.706546	0.258039	0.339377	0.344869	0.406268	0.685366	0.672658		265	0.799797	0.724366	0.43139	0.566933	0.728921	0.723179	0.793764	0.805934	0.7015	0.797622	0.748769		265	0.758077	0.924307	0.918398
270	1.15608	0.920911	1.12375	1.28533	1.24236	1.74826	1.28628		270	0.651762	0.238483	0.325299	0.325776	0.365286	0.624254	0.605752		270	0.793708	0.709137	0.414605	0.552157	0.715129	0.713571	0.784538	0.782066	0.697691	0.782512	0.738393		270	0.755871	0.924307	0.927547
275	1.15632	0.915081	1.11306	1.28641	1.23398	1.73955	1.27749		275	0.595368	0.229295	0.318473	0.313842	0.338486	0.576987	0.551428		275	0.792152	0.699372	0.402532	0.547577	0.704678	0.706265	0.778816	0.773589	0.696501	0.783255	0.733773		275	0.753822	0.935821	0.933729
280	1.14472	0.907711	1.10746	1.2813	1.21993	1.72336	1.26984		280	0.552467	0.219714	0.312287	0.305091	0.314379	0.538076	0.510485		280	0.790866	0.680772	0.388398	0.532949	0.689464	0.696057	0.777298	0.757528	0.698881	0.780035	0.722639		280	0.767849	0.931343	0.944857
285	1.14182	0.906721	1.09288	1.27243	1.21721	1.71162	1.26049		285	0.510977	0.213676	0.306954	0.295744	0.303318	0.514681	0.480727		285	0.786265	0.660544	0.374362	0.522311	0.674748	0.68695	0.768422	0.746152	0.684123	0.774585	0.710748		285	0.766588	0.930704	0.956479
290	1.13481	0.897701	1.09142	1.27217	1.20657	1.70343	1.25964		290	0.522256	0.250427	0.360495	0.334129	0.343449	0.535689	0.49271		290	0.783491	0.639154	0.362878	0.507831	0.661809	0.678143	0.760598	0.72563	0.683409	0.772851	0.699084		290	0.766115	0.93113	0.943126
295	1.13071	0.894951	1.08388	1.27942	1.20181	1.68671	1.24858		295	0.531319	0.324321	0.457125	0.399364	0.404991	0.559322	0.518874		295	0.780785	0.620553	0.350707	0.5	0.648372	0.671837	0.75581	0.720946	0.679838	0.761457	0.686208		295	0.762805	0.939019	0.950544
300	1.12539	0.888571	1.08266	1.27566	1.1966	1.68475	1.23554		300	0.546828	0.421971	0.574019	0.480509	0.465116	0.578181	0.543239		300	0.778011	0.604278	0.338045	0.492021	0.637281	0.661429	0.747168	0.710462	0.680076	0.747337	0.674619		300	0.75855	0.927719	0.945846
305	1.12274	0.884611	1.06954	1.26034	1.18279	1.66803	1.2449		305	0.553676	0.516209	0.673422	0.561456	0.522547	0.601814	0.577192		305	0.769553	0.584515	0.329898	0.478723	0.626973	0.654424	0.744365	0.691055	0.681742	0.747089	0.668484		305	0.751458	0.922175	0.941395
310	1.10848	0.877461	1.06054	1.26437	1.17712	1.65647	1.22534		310	0.577039	0.595616	0.752133	0.638823	0.571044	0.615183	0.608149		310	0.760555	0.574285	0.318512	0.46513	0.612825	0.65002	0.740512	0.69217	0.671507	0.738172	0.660456		310	0.753191	0.918763	0.949802
315	1.10655	0.876031	1.04765	1.25067	1.1658	1.64615	1.21854		315	0.583082	0.662029	0.80994	0.688345	0.607629	0.637384	0.643299		315	0.751827	0.558707	0.309089	0.458777	0.603299	0.648118	0.73222	0.682579	0.669126	0.729254	0.649171		315	0.75792	0.923454	0.943373
320	1.10727	0.870311	1.04936	1.26196	1.16172	1.64348	1.20493		320	0.596979	0.704948	0.853242	0.731504	0.642229	0.656481	0.67885		320	0.741407	0.544408	0.300059	0.447843	0.594199	0.63721	0.7293	0.676556	0.660319	0.71464	0.639703		320	0.744366	0.926226	0.942384
325	1.09978	0.865031	1.04644	1.24852	1.14383	1.62765	1.20635		325	0.616314	0.748392	0.890998	0.774065	0.672859	0.678921	0.714999		325	0.729567	0.531621	0.290538	0.437204	0.584601	0.633006	0.724279	0.669418	0.657463	0.705722	0.635992		325	0.738849	0.923028	0.934718
330	1.10147	0.862721	1.04012	1.25954	1.14134	1.63049	1.20323		330	0.632024	0.771624	0.922568	0.806484	0.698667	0.703509	0.744957		330	0.717253	0.520925	0.284256	0.428783	0.575857	0.624099	0.716805	0.661611	0.651274	0.698539	0.627509		330	0.735225	0.91258	0.929525
335	1.0935	0.853701	1.02772	1.25954	1.13182	1.61413	1.18622		335	0.646526	0.798267	0.943046	0.839897	0.718661	0.727859	0.774516		335	0.702368	0.509649	0.276796	0.422281	0.561993	0.614291	0.705827	0.655142	0.644846	0.69185	0.605393		335	0.730654	0.916844	0.927547
340	1.09036	0.852161	1.02261	1.26411	1.12503	1.60576	1.18991		340	0.657603	0.813624	0.954352	0.834527	0.73667	0.744092	0.80028		340	0.689242	0.499651	0.27179	0.412825	0.554315	0.605584	0.699988	0.643319	0.630326	0.673768	0.594562		340	0.733806	0.918337	0.925321
345	1.09084	0.851501	1.01702	1.25202	1.12503	1.59669	1.17914		345	0.668882	0.828324	0.970137	0.826173	0.75312	0.767725	0.826643		345	0.674831	0.491397	0.265116	0.40396	0.539955	0.590472	0.693098	0.635958	0.626279	0.665593	0.580095		345	0.731442	0.913859	0.931998
350	1.09616	0.847762	1.01313	1.25309	1.11257	1.58584	1.17064		350	0.689023	0.838693	0.982082	0.806285	0.765031	0.780855	0.854803		350	0.664547	0.482097	0.261091	0.399232	0.527158	0.581465	0.684924	0.628151	0.622233	0.662868	0.573733		350	0.730654	0.905757	0.935955
355	1.08746	0.846442	1.01459	1.24718	1.10895	1.58068	1.16695		355	0.696073	0.849455	0.983362	0.801313	0.773823	0.799714	0.873178		355	0.661096	0.477912	0.259914	0.39539	0.518555	0.566153	0.680953	0.619451	0.623661	0.65296	0.571007		355	0.727975	0.913006	0.943373
360	1.079	0.844792	1.00875	1.23885	1.1094	1.56485	1.17177		360	0.706546	0.865862	0.987415	0.801512	0.789563	0.813559	0.890154		360	0.65866	0.471635	0.257558	0.390662	0.515854	0.556045	0.68142	0.617221	0.6189	0.650731	0.567295		360	0.733333	0.917058	0.933976
365	1.08577	0.847322	1.00243	1.24745	1.11076	1.56147	1.17744		365	0.718228	0.857462	0.993601	0.783811	0.785593	0.824063	0.901738		365	0.66387	0.469309	0.257852	0.39273	0.518769	0.551942	0.680953	0.612536	0.608903	0.646024	0.570476		365	0.73223	0.92452	0.941642
370	1.07804	0.842482	0.992949	1.23966	1.08675	1.55097	1.16553		370	0.695065	0.604673	0.594923	0.710621	0.697674	0.765338	0.882165		370	0.668336	0.468379	0.258441	0.390071	0.519124	0.547538	0.68177	0.60696	0.616758	0.65618	0.570779		370	0.728763	0.916631	0.935707
375	1.07804	0.842152	0.995867	1.23213	1.08924	1.55097	1.17177		375	0.594361	0.319727	0.384386	0.580151	0.461713	0.599905	0.65009		375	0.679432	0.471169	0.257558	0.394504	0.526162	0.544836	0.684573	0.604729	0.6189	0.660144	0.575097		375	0.73554	0.920043	0.931751
380	1.06958	0.829282	0.982251	1.23375	1.08222	1.52873	1.16355		380	0.498691	0.24557	0.334684	0.485481	0.351248	0.499403	0.500899		380	0.686401	0.470356	0.260208	0.394356	0.523248	0.545436	0.678267	0.607406	0.616282	0.656923	0.57752		380	0.72829	0.919616	0.941889
385	1.03672	0.799582	0.950401	1.1878	1.03239	1.41132	1.10544		385	0.444914	0.220108	0.319326	0.429395	0.306721	0.463118	0.438985		385	0.6977	0.47582	0.260306	0.392435	0.527655	0.541133	0.68107	0.607406	0.617472	0.666832	0.579868		385	0.737273	0.914499	0.943373
390	1.00435	0.748213	0.895453	1.14401	0.941563	1.25351	0.993197		390	0.405841	0.20567	0.31186	0.399165	0.28616	0.441394	0.406431		390	0.703045	0.476401	0.261582	0.393617	0.525949	0.538931	0.674063	0.603391	0.607474	0.66485	0.57949		390	0.737431	0.919616	0.945846
395	0.963035	0.700913	0.831753	1.08893	0.869762	1.10977	0.905612		395	0.376435	0.200158	0.303114	0.369332	0.267725	0.427071	0.388256		395	0.709472	0.475238	0.260404	0.392287	0.522537	0.535528	0.664136	0.597591	0.60795	0.666584	0.580323		395	0.73948	0.922601	0.948566
400	0.91713	0.661643	0.784585	1.03923	0.794337	0.997154	0.844104		400	0.35851	0.194645	0.297142	0.35004	0.257799	0.408451	0.375874		400	0.719147	0.472448	0.262171	0.391105	0.525736	0.533527	0.662501	0.596476	0.612473	0.666584	0.58214		400	0.740741	0.921748	0.950049
405	0.876782	0.628864	0.753465	0.993015	0.753567	0.915851	0.80754		405	0.340987	0.189789	0.295648	0.334924	0.25156	0.404392	0.363092		405	0.721719	0.472332	0.264232	0.390366	0.524385	0.532226	0.658297	0.594691	0.602238	0.667823	0.583731		405	0.742632	0.923454	0.945846
410	0.841749	0.592784	0.717724	0.94949	0.70487	0.859989	0.785998		410	0.3428	0.192939	0.296928	0.333731	0.253261	0.407973	0.369283		410	0.723545	0.470123	0.265803	0.393026	0.527015	0.532326	0.652341	0.596699	0.601761	0.666832	0.585094		410	0.736013	0.927719	0.941395
415	0.810341	0.566384	0.695599	0.916711	0.669762	0.812667	0.760488		415	0.348238	0.202914	0.321886	0.334924	0.265457	0.409406	0.366886		415	0.725372	0.470123	0.267766	0.392583	0.528082	0.531325	0.651407	0.598037	0.599619	0.672777	0.590851		415	0.731757	0.921109	0.950544
420	0.788596	0.546255	0.681498	0.882859	0.647792	0.771749	0.746315		420	0.350453	0.223914	0.348976	0.338902	0.280346	0.411315	0.380667		420	0.728552	0.468961	0.266981	0.395686	0.530286	0.530024	0.652108	0.597368	0.603666	0.666336	0.593577		420	0.731127	0.912154	0.934718
425	0.760812	0.528655	0.655726	0.850349	0.620838	0.741149	0.735828		425	0.352669	0.241633	0.385026	0.343278	0.293676	0.41609	0.382664		425	0.727876	0.468379	0.267766	0.392878	0.531565	0.530224	0.649655	0.595137	0.601047	0.674263	0.592971		425	0.726714	0.920682	0.939169
430	0.740517	0.512375	0.645514	0.820527	0.603171	0.700765	0.726757		430	0.360121	0.26657	0.423422	0.341488	0.313528	0.423013	0.389255		430	0.730717	0.465124	0.26649	0.389184	0.530783	0.524219	0.648955	0.591345	0.597715	0.671043	0.590396		430	0.724823	0.921535	0.941889
435	0.713699	0.495765	0.637248	0.807362	0.588675	0.677993	0.720522		435	0.361732	0.303714	0.478242	0.344869	0.335366	0.423968	0.394048		435	0.730514	0.467449	0.268551	0.39273	0.530357	0.527022	0.651057	0.595137	0.598905	0.667327	0.595925		435	0.729551	0.916418	0.943373
440	0.694129	0.481355	0.626307	0.783718	0.57667	0.657534	0.718821		440	0.373414	0.351752	0.535836	0.348846	0.355644	0.428503	0.403036		440	0.727267	0.466519	0.270024	0.391696	0.531139	0.522418	0.648137	0.595137	0.599143	0.672777	0.59282		440	0.722143	0.930064	0.930267
445	0.686156	0.475745	0.616095	0.768404	0.568743	0.64597	0.721088		445	0.380262	0.414621	0.602602	0.354216	0.383012	0.434949	0.415818		445	0.725981	0.464892	0.272968	0.393322	0.52993	0.518114	0.642999	0.59246	0.596763	0.671043	0.58926		445	0.722774	0.923881	0.938427
450	0.674076	0.470465	0.61488	0.761956	0.557191	0.636542	0.717971		450	0.386304	0.483266	0.665742	0.364558	0.413783	0.439484	0.427601		450	0.721922	0.461404	0.273066	0.391992	0.531068	0.517714	0.64767	0.58733	0.597239	0.672034	0.587972		450	0.720567	0.93113	0.939664
455	0.669727	0.473105	0.613907	0.767329	0.561495	0.636008	0.727608		455	0.397986	0.539572	0.720776	0.369531	0.440442	0.446407	0.434791		455	0.720974	0.462916	0.275226	0.394651	0.527584	0.51241	0.643816	0.589784	0.600571	0.675502	0.588048		455	0.722301	0.928571	0.942384
460	0.681807	0.487845	0.61415	0.778345	0.571008	0.651841	0.729592		460	0.414502	0.599422	0.764292	0.374304	0.466251	0.45142	0.451168		460	0.716847	0.463381	0.272772	0.396868	0.525807	0.508907	0.649072	0.586215	0.602238	0.672777	0.590926		460	0.722931	0.929211	0.935213
465	0.69582	0.499505	0.618283	0.795271	0.575311	0.681196	0.727891		465	0.425982	0.654548	0.80866	0.380867	0.493193	0.466937	0.469742		465	0.71184	0.466636	0.278269	0.399232	0.527726	0.509207	0.646736	0.587553	0.599619	0.677979	0.583579		465	0.724035	0.930064	0.941395
470	0.704276	0.505115	0.625091	0.807899	0.575991	0.693471	0.730159		470	0.441088	0.689067	0.835324	0.387033	0.5173	0.473144	0.483523		470	0.710555	0.470007	0.281017	0.400561	0.528153	0.51221	0.647553	0.592237	0.610331	0.68541	0.584867		470	0.730024	0.933475	0.946835
475	0.709108	0.511715	0.623146	0.821601	0.587089	0.718555	0.734977		475	0.455992	0.718598	0.856442	0.392403	0.540414	0.482931	0.508688		475	0.703248	0.467333	0.282489	0.400118	0.527655	0.506205	0.64767	0.589114	0.602476	0.687144	0.581913		475	0.726556	0.929424	0.926311
480	0.725538	0.517325	0.619499	0.833692	0.601812	0.738481	0.737528		480	0.469688	0.73343	0.869454	0.396579	0.55814	0.488899	0.529059		480	0.70318	0.467566	0.283569	0.40529	0.528082	0.502502	0.643933	0.589784	0.607236	0.680703	0.584564		480	0.726399	0.928145	0.96365
485	0.734719	0.518755	0.625821	0.850081	0.604077	0.760719	0.739796		485	0.476536	0.742617	0.875213	0.40175	0.571185	0.499403	0.55702		485	0.700947	0.465706	0.28298	0.409279	0.5273	0.501501	0.642649	0.591345	0.607474	0.687887	0.585624		485	0.656738	0.857143	0.75
490	0.733511	0.521505	0.626064	0.859484	0.615855	0.779754	0.745181		490	0.482578	0.74708	0.875213	0.411695	0.581821	0.506804	0.581186		490	0.696955	0.463729	0.286612	0.404108	0.52538	0.498899	0.642181	0.58733	0.60795	0.684667	0.585549		490	0.498818	0.709382	0.652819
495	0.745349	0.524365	0.625334	0.869425	0.617667	0.798079	0.750567		495	0.487613	0.737498	0.867534	0.415274	0.576716	0.500836	0.589974		495	0.685521	0.465938	0.286121	0.401596	0.522323	0.494896	0.634707	0.590899	0.607712	0.689869	0.577217		495	0.473286	0.688486	0.694115
500	0.752356	0.531515	0.630197	0.883933	0.638279	0.827967	0.747732		500	0.494663	0.736317	0.868814	0.414877	0.587351	0.512533	0.619533		500	0.66908	0.459544	0.282686	0.398197	0.513934	0.488391	0.623847	0.581753	0.611759	0.678722	0.565856		500	0.511269	0.708955	0.701286
505	0.754047	0.536685	0.626793	0.897636	0.657305	0.845935	0.754819		505	0.504532	0.716104	0.817833	0.420843	0.587067	0.524946	0.638706		505	0.652909	0.449547	0.265116	0.388741	0.497512	0.476681	0.603527	0.571492	0.597477	0.677731	0.543361		505	0.52435	0.693603	0.703264
510	0.760087	0.537125	0.628495	0.908383	0.668856	0.870841	0.763605		510	0.480967	0.571335	0.601536	0.393397	0.519711	0.510146	0.598762		510	0.625372	0.425134	0.232921	0.358452	0.467795	0.448559	0.575616	0.561231	0.587955	0.656428	0.459365		510	0.545626	0.698294	0.696835
515	0.771684	0.543505	0.636275	0.921548	0.672027	0.886675	0.759637		515	0.430614	0.358315	0.405077	0.343278	0.392087	0.452614	0.486319		515	0.573478	0.382585	0.201413	0.326093	0.422864	0.395717	0.525984	0.540932	0.560819	0.621006	0.328562		515	0.550197	0.699147	0.698566
520	0.767577	0.543395	0.632628	0.929339	0.680181	0.912649	0.76729		520	0.370796	0.247802	0.329991	0.302705	0.298071	0.414419	0.401438		520	0.503112	0.34027	0.181488	0.299202	0.376653	0.345877	0.468294	0.511042	0.534635	0.582859	0.237067		520	0.553664	0.697441	0.68818
525	0.778932	0.547685	0.637491	0.937131	0.706455	0.932752	0.780329		525	0.32286	0.20252	0.295435	0.277645	0.249433	0.395082	0.3573		525	0.43207	0.298535	0.169513	0.275709	0.329873	0.301241	0.409553	0.487843	0.504166	0.540005	0.192153		525	0.56249	0.696375	0.695846
530	0.76951	0.550324	0.634087	0.949221	0.711212	0.953745	0.781746		530	0.286808	0.179026	0.283703	0.257558	0.22717	0.377656	0.33553		530	0.367253	0.268193	0.16117	0.263298	0.294824	0.270416	0.364475	0.46219	0.479648	0.505326	0.169658		530	0.566115	0.702985	0.69634
535	0.777241	0.550764	0.638463	0.952982	0.726387	0.973848	0.785998		535	0.280967	0.175351	0.281997	0.253182	0.218661	0.375985	0.326143		535	0.319689	0.243432	0.157931	0.251478	0.266458	0.2497	0.334345	0.444345	0.456796	0.476344	0.157843		535	0.567061	0.696375	0.695104
540	0.783039	0.553184	0.630197	0.962654	0.737712	0.990037	0.787132		540	0.274924	0.172857	0.280077	0.253381	0.213556	0.37503	0.326343		540	0.280379	0.2289	0.153514	0.246158	0.243211	0.23709	0.309821	0.429846	0.440133	0.456032	0.149663		540	0.566903	0.697868	0.698318
545	0.784972	0.556044	0.643083	0.978238	0.748131	1.01299	0.801304		545	0.274924	0.172332	0.277944	0.250597	0.210437	0.366913	0.321949		545	0.249188	0.21588	0.153121	0.237589	0.229418	0.226281	0.297209	0.420031	0.423471	0.444142	0.14421		545	0.574153	0.69403	0.697577
550	0.782315	0.559454	0.642354	0.978238	0.761721	1.03647	0.798469		550	0.272105	0.173382	0.27965	0.250398	0.211288	0.367152	0.322149		550	0.226522	0.211114	0.150275	0.235225	0.216124	0.220576	0.284363	0.405309	0.42228	0.431756	0.142771		550	0.573207	0.695096	0.691147
555	0.788355	0.563524	0.634816	0.99597	0.769422	1.05711	0.811791		555	0.289426	0.179157	0.291809	0.263723	0.224617	0.391502	0.343719		555	0.207713	0.200884	0.149588	0.23552	0.207166	0.217774	0.275137	0.39081	0.412283	0.4216	0.13762		555	0.573207	0.688699	0.694609
560	0.784489	0.564844	0.640895	0.991134	0.764439	1.05942	0.809524		560	0.310171	0.193595	0.322312	0.276054	0.239365	0.404154	0.373877		560	0.193234	0.196117	0.148312	0.230053	0.19636	0.210869	0.2714	0.388802	0.409426	0.420857	0.135727		560	0.579669	0.692324	0.690653
565	0.78618	0.565064	0.641138	1.00403	0.779162	1.07739	0.814909		565	0.333736	0.213151	0.366681	0.284606	0.257232	0.42349	0.398442		565	0.183356	0.191816	0.148214	0.228132	0.191241	0.208767	0.263693	0.386571	0.401571	0.409215	0.133833		565	0.575887	0.691898	0.691889
570	0.794153	0.571664	0.639193	1.01693	0.785957	1.09518	0.825397		570	0.353474	0.244652	0.433447	0.302506	0.282189	0.430174	0.423008		570	0.173207	0.191118	0.147919	0.227985	0.18726	0.207266	0.259021	0.380103	0.394906	0.404261	0.13353		570	0.578566	0.689765	0.687191
575	0.798744	0.582664	0.650863	1.02015	0.802492	1.10977	0.841837		575	0.387714	0.295971	0.523464	0.317224	0.317215	0.455479	0.462752		575	0.167524	0.186933	0.147428	0.224734	0.184843	0.204263	0.256919	0.377203	0.392288	0.40971	0.13247		575	0.572419	0.690618	0.69634
580	0.808408	0.588494	0.651349	1.04003	0.80974	1.1256	0.844955		580	0.413696	0.363959	0.617321	0.33393	0.36245	0.470041	0.505692		580	0.161637	0.184259	0.147036	0.227394	0.180009	0.202362	0.255635	0.376757	0.392526	0.40104	0.131258		580	0.573838	0.70064	0.692631
585	0.804059	0.591684	0.65913	1.04406	0.814043	1.13076	0.854592		585	0.448137	0.446778	0.704991	0.350239	0.411656	0.479351	0.549231		585	0.158457	0.185887	0.144778	0.228871	0.178373	0.201661	0.251898	0.372072	0.389907	0.398068	0.130576		585	0.579511	0.701706	0.699555
590	0.810582	0.594214	0.657185	1.0395	0.828992	1.14037	0.856859		590	0.483384	0.541935	0.768131	0.373508	0.475043	0.491048	0.594368		590	0.155683	0.182283	0.145465	0.226212	0.17688	0.201461	0.252482	0.37408	0.385146	0.399306	0.130955		590	0.573522	0.697228	0.700297
595	0.810824	0.595644	0.662047	1.06072	0.828539	1.14873	0.863095		595	0.517422	0.634073	0.81698	0.390811	0.533607	0.507042	0.629519		595	0.156022	0.182864	0.146545	0.224734	0.176312	0.201161	0.255168	0.366942	0.387051	0.39782	0.129743		595	0.579354	0.707036	0.694362
600	0.806958	0.602354	0.660102	1.06367	0.840997	1.15211	0.865363		600	0.544612	0.714529	0.84599	0.411098	0.587351	0.517785	0.663671		600	0.154668	0.186003	0.145073	0.224439	0.176809	0.203062	0.252482	0.367834	0.388955	0.397572	0.12997		600	0.580772	0.701706	0.700297
605	0.810824	0.604664	0.659859	1.06153	0.833749	1.16474	0.874717		605	0.566767	0.777136	0.866681	0.427605	0.628758	0.533779	0.690833		605	0.154601	0.182748	0.144876	0.223257	0.177591	0.202362	0.256335	0.373188	0.391097	0.400545	0.132849		605	0.57762	0.70533	0.69634
610	0.814931	0.609174	0.664478	1.07174	0.833749	1.17097	0.876984		610	0.589124	0.821236	0.885666	0.444312	0.667328	0.550967	0.72139		610	0.156901	0.182748	0.145269	0.223552	0.178516	0.204363	0.260423	0.371403	0.388479	0.401288	0.130955		610	0.577778	0.706183	0.700544
615	0.811307	0.609614	0.665937	1.06744	0.846433	1.17826	0.884637		615	0.604834	0.849455	0.896971	0.459228	0.693562	0.566484	0.743359		615	0.160014	0.183911	0.147527	0.223109	0.180719	0.204063	0.261474	0.374303	0.394906	0.405004	0.132546		615	0.576832	0.703838	0.697577
620	0.812515	0.613794	0.66618	1.07657	0.848018	1.1884	0.88322		620	0.63001	0.875705	0.912756	0.479714	0.716818	0.575316	0.77831		620	0.161773	0.186585	0.147036	0.227837	0.182284	0.205965	0.265211	0.373188	0.394906	0.405499	0.132015		620	0.577935	0.697655	0.692384
625	0.811065	0.615774	0.664722	1.07496	0.856399	1.1884	0.893991		625	0.634844	0.882268	0.917449	0.499204	0.732133	0.588207	0.7857		625	0.164817	0.189607	0.146938	0.227689	0.183563	0.207766	0.265678	0.377426	0.399191	0.404508	0.132773		625	0.580615	0.698081	0.699555
630	0.813723	0.617644	0.666667	1.07926	0.861382	1.1989	0.893991		630	0.639476	0.876099	0.920009	0.50537	0.735111	0.577226	0.805472		630	0.166576	0.188445	0.146741	0.225325	0.186051	0.208267	0.269298	0.369172	0.402999	0.405251	0.133227		630	0.579669	0.70064	0.699802
635	0.81179	0.618744	0.674204	1.08813	0.85957	1.20957	0.897109		635	0.651561	0.877937	0.920009	0.515513	0.745179	0.59704	0.830437		635	0.168065	0.189491	0.147232	0.224734	0.187829	0.209468	0.272334	0.376311	0.400619	0.414664	0.134818		635	0.583136	0.698081	0.704006
640	0.818797	0.624134	0.664478	1.08275	0.869989	1.21313	0.896542		640	0.666264	0.884237	0.928754	0.527645	0.76177	0.61566	0.846016		640	0.170365	0.190653	0.148017	0.227837	0.190744	0.21247	0.276305	0.377203	0.404904	0.41293	0.136333		640	0.577147	0.696162	0.693867
645	0.818555	0.626004	0.663749	1.09189	0.865006	1.21936	0.897959		645	0.673112	0.883712	0.934514	0.537987	0.771412	0.634996	0.862992		645	0.172733	0.193908	0.14949	0.231531	0.193587	0.214572	0.279575	0.376087	0.404666	0.409462	0.136863		645	0.582033	0.695736	0.696093
650	0.818072	0.628424	0.669827	1.08839	0.876331	1.22825	0.904195											650	0.173748	0.194141	0.147036	0.230201	0.197711	0.215272	0.28121	0.374972	0.409188	0.408967	0.138908		650	0.580615	0.695736	0.684471
655	0.829427	0.637774	0.673231	1.10102	0.888335	1.22789	0.920068											655	0.177199	0.194373	0.149882	0.227985	0.199844	0.216974	0.289151	0.376534	0.412759	0.415655	0.139514		655	0.585185	0.696375	0.69634
660	0.820246	0.639644	0.678337	1.09753	0.883805	1.22594	0.92432											660	0.17862	0.196001	0.148508	0.230496	0.200981	0.218975	0.285531	0.376757	0.414425	0.41516	0.140195		660	0.575256	0.691258	0.70178
665	0.772409	0.591024	0.654024	1.02257	0.802492	0.922256	0.876984											665	0.181529	0.195652	0.148901	0.227985	0.20873	0.223679	0.292771	0.378764	0.418948	0.415407	0.142695		665	0.575887	0.695096	0.686944
670	0.646775	0.412386	0.59397	0.798495	0.592752	0.446362	0.731009											670	0.181529	0.197628	0.149293	0.231678	0.209939	0.223179	0.295107	0.377649	0.4199	0.416398	0.142013		670	0.575887	0.693817	0.692631
675	0.548442	0.312287	0.548018	0.668189	0.504643	0.393524	0.689626											675	0.183897	0.19821	0.147919	0.231087	0.212285	0.226681	0.30188	0.383672	0.424661	0.420362	0.144513		675	0.578093	0.693177	0.683482
680	0.503745	0.274337	0.527109	0.623858	0.485617	0.384451	0.67602											680	0.186536	0.199721	0.149293	0.233156	0.216906	0.230484	0.304099	0.382333	0.422995	0.416151	0.145043		680	0.568006	0.694456	0.692136
685	0.4849	0.260257	0.520058	0.592423	0.47248	0.374666	0.665816											685	0.187686	0.202744	0.149686	0.232565	0.222878	0.231886	0.307019	0.380772	0.427279	0.421848	0.145421		685	0.567849	0.683582	0.683976
690	0.474028	0.251127	0.510819	0.589737	0.465685	0.372709	0.668934											690	0.190122	0.203557	0.15106	0.23227	0.228423	0.235689	0.31204	0.37921	0.434896	0.421105	0.148224		690	0.565327	0.683369	0.681998
695	0.463397	0.245628	0.504741	0.575228	0.462514	0.372887	0.660714											695	0.192558	0.204371	0.15106	0.235372	0.229774	0.240993	0.316128	0.383002	0.437515	0.425068	0.148754		695	0.567376	0.684648	0.680762
700	0.457115	0.239028	0.504984	0.577915	0.468856	0.373421	0.659297											700	0.195399	0.206696	0.150275	0.233452	0.235817	0.240693	0.324886	0.381441	0.435849	0.43027	0.149663		700	0.561387	0.677612	0.674827
705	0.453008	0.238258	0.508145	0.567437	0.459343	0.37182	0.655896											705	0.197632	0.208207	0.151747	0.236111	0.23994	0.245997	0.330141	0.384787	0.443466	0.430765	0.152238
710	0.45325	0.239248	0.501337	0.57281	0.45889	0.368973	0.661281											710	0.202233	0.209835	0.154299	0.237441	0.248258	0.251501	0.334696	0.387241	0.452035	0.425068	0.154813
715	0.448417	0.237598	0.500365	0.565556	0.46342	0.371108	0.663832											715	0.207104	0.210765	0.151355	0.238327	0.253021	0.256705	0.342403	0.38791	0.449893	0.430765	0.155192
720	0.453008	0.235398	0.502796	0.562601	0.460023	0.3752	0.663265											720	0.209405	0.215183	0.153416	0.235963	0.260842	0.258006	0.34871	0.391033	0.457034	0.430022	0.158297
725	0.456632	0.236938	0.509361	0.573616	0.459117	0.377691	0.660431											725	0.21272	0.215648	0.152925	0.238032	0.26724	0.265412	0.353381	0.391702	0.462033	0.433986	0.159358
730	0.458082	0.238808	0.510819	0.58087	0.462288	0.377691	0.664399											730	0.216171	0.217043	0.153808	0.241283	0.273141	0.267314	0.357935	0.388802	0.463699	0.434976	0.160494
735	0.456632	0.237818	0.507416	0.580333	0.458211	0.383028	0.662415											735	0.217727	0.216694	0.155379	0.241578	0.279682	0.275721	0.366811	0.387687	0.466794	0.44216	0.16322
740	0.453008	0.238258	0.50547	0.577378	0.471574	0.379292	0.659864											740	0.220704	0.218903	0.156753	0.240691	0.285582	0.276621	0.369964	0.395048	0.470602	0.436958	0.165796
745	0.455424	0.238038	0.503525	0.583289	0.462967	0.381961	0.656179											745	0.223748	0.221576	0.15636	0.24409	0.294113	0.284327	0.377905	0.390364	0.473459	0.442903	0.168068
750	0.458806	0.239688	0.50547	0.578184	0.46342	0.380893	0.665816											750	0.225237	0.222274	0.155281	0.242021	0.296531	0.288731	0.381876	0.392148	0.474649	0.437701	0.16928
755	0.457115	0.241118	0.504498	0.577109	0.469083	0.381605	0.670068											755	0.228281	0.222739	0.156851	0.245124	0.304849	0.293034	0.386313	0.396832	0.478458	0.439188	0.172082
760	0.45784	0.243098	0.504741	0.588662	0.464779	0.383384	0.665533											760	0.230244	0.224366	0.158029	0.246011	0.307621	0.296137	0.393203	0.389917	0.480124	0.441665	0.175036
765	0.460256	0.241888	0.506443	0.589737	0.464779	0.384807	0.668934											765	0.232003	0.22425	0.157244	0.245863	0.31402	0.303042	0.397291	0.392594	0.484408	0.440426	0.176021
770	0.463397	0.240018	0.501094	0.593229	0.467044	0.38712	0.670351											770	0.235453	0.225994	0.157735	0.244976	0.321058	0.308046	0.402896	0.39594	0.485837	0.443399	0.179202
775	0.456874	0.244748	0.504498	0.594035	0.457305	0.383917	0.672336											775	0.235183	0.228203	0.158029	0.244385	0.325537	0.310048	0.405232	0.398394	0.490121	0.440426	0.180717
780	0.464363	0.244418	0.502553	0.596185	0.469989	0.384451	0.673469											780	0.238972	0.23076	0.159305	0.249557	0.33357	0.315052	0.412122	0.399063	0.490836	0.441417	0.184125
785	0.45784	0.246398	0.507659	0.591886	0.46795	0.38623	0.6678											785	0.242896	0.233783	0.161759	0.252216	0.339898	0.32456	0.416676	0.401517	0.494168	0.444389	0.187912
790	0.462672	0.246838	0.508145	0.60129	0.469536	0.387476	0.671769											790	0.244993	0.235178	0.162348	0.25133	0.346012	0.32446	0.420997	0.405755	0.503214	0.446123	0.188896
795	0.455907	0.246508	0.502796	0.600752	0.464326	0.38623	0.666383											795	0.248512	0.236108	0.165096	0.25458	0.355609	0.333167	0.429406	0.402632	0.507736	0.455041	0.19435
800	0.45784	0.247168	0.502553	0.606394	0.461155	0.386052	0.666383											800	0.252977	0.240874	0.16382	0.256058	0.359022	0.33697	0.43431	0.404863	0.506546	0.450087	0.197758
805	0.462189	0.248048	0.504255	0.605051	0.46795	0.387298	0.674036											805	0.255007	0.240874	0.164409	0.25724	0.372956	0.342974	0.437814	0.407317	0.512259	0.45727	0.20056
810	0.461223	0.246618	0.508145	0.602902	0.462288	0.38961	0.669218											810	0.259269	0.242967	0.167648	0.257979	0.379639	0.348479	0.443303	0.405309	0.51702	0.456775	0.207907
815	0.462431	0.248598	0.507416	0.611768	0.471801	0.38961	0.667517											815	0.261908	0.246454	0.170691	0.263446	0.388668	0.357586	0.450426	0.411109	0.519162	0.456527	0.212679
820	0.461706	0.249038	0.510576	0.613917	0.470668	0.391034	0.6678											820	0.265562	0.248547	0.170495	0.267878	0.402673	0.366493	0.4579	0.413785	0.526779	0.457766	0.219647
825	0.455424	0.253107	0.502796	0.61741	0.468856	0.38961	0.667517											825	0.269892	0.251686	0.173341	0.269799	0.409285	0.372098	0.463039	0.416239	0.531064	0.458509	0.227676
830	0.463155	0.251017	0.507416	0.622515	0.465912	0.392101	0.671485											830	0.274222	0.256219	0.175697	0.272902	0.422579	0.384007	0.469462	0.420031	0.540586	0.464949	0.232902
835	0.460739	0.252887	0.505714	0.620365	0.462967	0.392991	0.663265											835	0.277673	0.260172	0.176875	0.276596	0.428835	0.391613	0.475534	0.420923	0.54368	0.469903	0.238885
840	0.459773	0.253437	0.499149	0.632724	0.471574	0.396015	0.666667											840	0.281529	0.264357	0.181979	0.278664	0.439997	0.401421	0.481257	0.424269	0.549393	0.473867	0.247671
845	0.460739	0.252227	0.505957	0.637292	0.474519	0.396549	0.670068											845	0.284168	0.267031	0.186199	0.282358	0.452154	0.408827	0.486745	0.422708	0.553202	0.467674	0.252215
850	0.459048	0.253327	0.500851	0.641859	0.471801	0.399573	0.666383											850	0.287889	0.270053	0.188064	0.288121	0.462463	0.415633	0.487796	0.431854	0.557724	0.474114	0.259562
855	0.463397	0.253657	0.50158	0.653681	0.471801	0.399929	0.665533											855	0.291949	0.274587	0.191794	0.295804	0.474264	0.42554	0.493402	0.432077	0.56558	0.482041	0.268197
860	0.462914	0.256517	0.508874	0.657442	0.475651	0.400463	0.669501											860	0.296211	0.275982	0.197389	0.296838	0.484431	0.434848	0.501226	0.435423	0.571531	0.482041	0.274938
865	0.457115	0.254317	0.508631	0.667114	0.474292	0.409002	0.663832											865	0.3	0.278075	0.202101	0.304817	0.495166	0.442454	0.501927	0.440107	0.571531	0.484518	0.284178
870	0.462914	0.257617	0.504741	0.665502	0.483579	0.408468	0.666383											870	0.305345	0.282376	0.20534	0.304817	0.506398	0.451261	0.514656	0.437653	0.577482	0.48427	0.291903
875	0.456874	0.255417	0.511306	0.687265	0.484258	0.413094	0.664683											875	0.308728	0.286794	0.210934	0.316342	0.513721	0.455865	0.516174	0.439215	0.57891	0.485261	0.299326
880	0.461947	0.257507	0.507416	0.687534	0.485617	0.418075	0.662698											880	0.311773	0.289003	0.21545	0.32107	0.525878	0.464572	0.523648	0.444791	0.578672	0.488482	0.308415
885	0.463155	0.259707	0.512278	0.698012	0.48675	0.421811	0.662132											885	0.316982	0.291793	0.223989	0.327866	0.536329	0.469976	0.524583	0.448584	0.589145	0.491702	0.316292
890	0.462914	0.259487	0.510819	0.703923	0.493998	0.42448	0.662415											890	0.318809	0.295861	0.231449	0.335845	0.545358	0.47488	0.527385	0.445684	0.588907	0.495417	0.324547
895	0.458323	0.264657	0.511062	0.71655	0.492865	0.428749	0.671202											895	0.323613	0.298768	0.238516	0.34471	0.555311	0.483787	0.534159	0.452153	0.593668	0.498142	0.330834
900	0.462672	0.263887	0.506686	0.724879	0.496716	0.433731	0.662132											900	0.324154	0.300512	0.24254	0.345006	0.560856	0.488691	0.529371	0.452599	0.593906	0.502106	0.337196
905	0.464122	0.264987	0.510819	0.730521	0.493545	0.436755	0.661281											905	0.328011	0.303185	0.245779	0.350177	0.567183	0.489792	0.536728	0.453491	0.598905	0.496904	0.34371
910	0.460739	0.265867	0.513494	0.742343	0.50034	0.445828	0.666383											910	0.329973	0.303418	0.24892	0.358304	0.571378	0.490092	0.543034	0.453714	0.595811	0.500372	0.348406
915	0.460256	0.267627	0.51787	0.754702	0.503964	0.45419	0.668367											915	0.331258	0.301558	0.252454	0.357122	0.576781	0.493295	0.540815	0.459068	0.595572	0.493931	0.354768
920	0.461464	0.267737	0.516655	0.761419	0.5094	0.45757	0.663832											920	0.331394	0.305394	0.257656	0.362293	0.582113	0.494896	0.545136	0.455052	0.598905	0.496904	0.358328
925	0.464847	0.270267	0.512035	0.767867	0.511212	0.46522	0.668084											925	0.336062	0.305162	0.260601	0.361702	0.586805	0.497298	0.547705	0.456391	0.597001	0.502353	0.362569
930	0.471853	0.275877	0.524921	0.782375	0.525481	0.480519	0.663549											930	0.339378	0.305394	0.263153	0.364362	0.590502	0.4995	0.551325	0.452376	0.599143	0.503096	0.364311
935	0.479343	0.280167	0.528811	0.804944	0.537939	0.495997	0.689342											935	0.337212	0.307138	0.265803	0.367908	0.594625	0.496998	0.55296	0.45706	0.599381	0.504087	0.369916
940	0.480068	0.286547	0.534403	0.814884	0.546772	0.510052	0.685374											940	0.341204	0.308417	0.267668	0.367465	0.603085	0.502302	0.554362	0.463975	0.600809	0.508298	0.371885
945	0.48949	0.290067	0.534889	0.830199	0.552888	0.524818	0.686508											945	0.344114	0.310044	0.27287	0.372784	0.605929	0.505504	0.559033	0.457506	0.597477	0.505573	0.377187
950	0.483692	0.291937	0.543399	0.84202	0.559683	0.537627	0.687075											950	0.343978	0.310742	0.275128	0.376921	0.606782	0.506005	0.556697	0.462414	0.597953	0.504087	0.379914
955	0.486833	0.294797	0.533187	0.850887	0.570328	0.553638	0.693027											955	0.344317	0.310974	0.281115	0.377512	0.612541	0.509307	0.560785	0.468213	0.607236	0.505326	0.380823
960	0.491181	0.294027	0.538536	0.85223	0.575311	0.569472	0.695862											960	0.349053	0.314578	0.287102	0.378694	0.616238	0.510408	0.567908	0.466206	0.608665	0.51028	0.387942
965	0.485383	0.294577	0.53805	0.865664	0.577123	0.582281	0.696712											965	0.351286	0.315276	0.291421	0.385786	0.62157	0.516113	0.566741	0.463529	0.604142	0.509289	0.390139
970	0.486349	0.295457	0.541454	0.86647	0.585957	0.593489	0.687358											970	0.350203	0.314229	0.293581	0.388002	0.619508	0.511609	0.558216	0.467098	0.603904	0.512014	0.38673
975	0.48949	0.297437	0.544858	0.89065	0.592525	0.612169	0.693311											975	0.340528	0.305743	0.288477	0.374852	0.586521	0.492394	0.537195	0.458398	0.584385	0.503096	0.366811
980	0.487799	0.300957	0.540238	0.887963	0.597508	0.625334	0.690193											980	0.237415	0.222158	0.184923	0.260786	0.379639	0.33707	0.396473	0.380103	0.434896	0.432995	0.187988
985	0.492631	0.301617	0.539023	0.895755	0.608607	0.644014	0.699546											985	0.129499	0.167752	0.146643	0.214835	0.171051	0.197958	0.243139	0.344189	0.357772	0.378747	0.122851
990	0.48949	0.305467	0.546803	0.898442	0.616761	0.660737	0.698129											990	0.111705	0.159382	0.142226	0.209959	0.149865	0.18775	0.221651	0.336159	0.357534	0.3676	0.119518
995	0.493114	0.304917	0.540481	0.908383	0.616535	0.676036	0.69898											995	0.109066	0.161474	0.141932	0.210993	0.145457	0.186749	0.218732	0.331921	0.355868	0.376765	0.118231
1000	0.496014	0.310307	0.547775	0.913756	0.633296	0.698452	0.7089											1000	0.107984	0.159149	0.143208	0.205969	0.144249	0.185949	0.216279	0.333259	0.354677	0.367352	0.118003
1005	0.500846	0.312067	0.54194	0.920204	0.638052	0.709838	0.702381											1005	0.108119	0.158103	0.143011	0.210106	0.145457	0.183647	0.214995	0.333036	0.352297	0.374536	0.116867
1010	0.492873	0.310967	0.546803	0.92504	0.645074	0.729052	0.69983											1010	0.107781	0.159382	0.142422	0.207151	0.142684	0.181445	0.213243	0.334151	0.349917	0.366857	0.116261
1015	0.497946	0.312507	0.546803	0.93525	0.653681	0.746308	0.706916											1015	0.106292	0.158335	0.14203	0.210254	0.144106	0.184347	0.211725	0.335267	0.354915	0.369581	0.116489
1020	0.503986	0.315367	0.548505	0.941698	0.658664	0.762498	0.702381											1020	0.108254	0.1588	0.142324	0.209811	0.145386	0.184448	0.212893	0.331474	0.351107	0.370324	0.118306
1025	0.503503	0.317347	0.55045	0.943579	0.656852	0.776374	0.709751											1025	0.113532	0.163915	0.147527	0.21779	0.157543	0.193054	0.224571	0.341959	0.365627	0.377756	0.12588
1030	0.498671	0.315587	0.546803	0.945997	0.663194	0.79114	0.713152											1030	0.12544	0.174611	0.159305	0.229905	0.191881	0.218875	0.248861	0.358465	0.379672	0.387664	0.142846
1035	0.503745	0.317897	0.549234	0.956206	0.672707	0.80733	0.719388											1035	0.137077	0.18984	0.169709	0.243647	0.236172	0.250801	0.287983	0.370288	0.416806	0.396086	0.162993
1040	0.503986	0.318777	0.554097	0.959968	0.676104	0.819249	0.7072											1040	0.154195	0.206231	0.180016	0.258717	0.279824	0.285128	0.326404	0.387464	0.460843	0.418132	0.18564
1045	0.507852	0.319547	0.552881	0.962923	0.678143	0.833659	0.720522											1045	0.170298	0.222623	0.184629	0.26906	0.332717	0.320456	0.373	0.394825	0.495358	0.434976	0.210028
1050	0.504953	0.319987	0.553854	0.960774	0.681767	0.844156	0.717687											1050	0.189378	0.238898	0.194739	0.287677	0.382483	0.351281	0.417611	0.40464	0.520114	0.457518	0.232371
1055	0.507127	0.320427	0.553367	0.970177	0.688562	0.857677	0.719104											1055	0.207984	0.253546	0.200824	0.294178	0.432106	0.381205	0.446222	0.416462	0.55463	0.478573	0.257366
1060	0.503986	0.323177	0.559689	0.972864	0.690374	0.865149	0.721939											1060	0.227064	0.268542	0.206321	0.304817	0.474762	0.401821	0.47822	0.422485	0.568198	0.491702	0.276983
1065	0.505678	0.326257	0.556042	0.978238	0.694451	0.878313	0.721088											1065	0.24452	0.280865	0.213094	0.317228	0.513294	0.419335	0.493402	0.429177	0.590336	0.50706	0.295387
1070	0.50906	0.326257	0.554583	0.976088	0.705323	0.884896	0.719955											1070	0.263464	0.290863	0.218492	0.323877	0.544718	0.435048	0.50543	0.4352	0.589622	0.508298	0.311596
1075	0.507852	0.324827	0.560175	0.981462	0.698754	0.896104	0.726757											1075	0.280853	0.300279	0.223596	0.331708	0.578132	0.448459	0.517576	0.440999	0.599619	0.516968	0.329243
1080	0.513892	0.327247	0.555799	0.984417	0.708041	0.90749	0.732143											1080	0.29594	0.307719	0.225265	0.335697	0.598038	0.459367	0.522013	0.445238	0.60676	0.517711	0.34424
1085	0.513409	0.328677	0.558959	0.986835	0.711891	0.912827	0.738379											1085	0.309066	0.313067	0.228799	0.339835	0.614674	0.464171	0.531356	0.437207	0.604856	0.523161	0.359918
1090	0.515825	0.327797	0.556528	0.987372	0.71325	0.920299	0.735261											1090	0.324899	0.320158	0.231252	0.342937	0.632092	0.471978	0.533808	0.452822	0.612473	0.526876	0.371355
1095	0.51655	0.331207	0.563579	0.997582	0.718913	0.929728	0.738095											1095	0.337686	0.322599	0.234099	0.34471	0.640623	0.477282	0.535794	0.45126	0.612473	0.527124	0.384079
1100	0.519208	0.331427	0.562363	0.99597	0.721404	0.92955	0.738946											1100	0.348241	0.327714	0.236356	0.34737	0.647803	0.476982	0.544319	0.455499	0.615806	0.531831	0.392259
1105	0.519691	0.330657	0.555799	0.997582	0.719819	0.938801	0.736961											1105	0.359472	0.329575	0.238221	0.35003	0.652566	0.482386	0.546888	0.456614	0.622947	0.535794	0.397788
1110	0.518241	0.333297	0.561391	0.996239	0.724802	0.948586	0.748583											1110	0.36908	0.333178	0.242933	0.354758	0.660316	0.483787	0.547939	0.457283	0.620328	0.541987	0.405135
1115	0.524281	0.336157	0.554583	1.00107	0.722084	0.946985	0.739796											1115	0.380379	0.334108	0.246172	0.355792	0.666216	0.486089	0.553895	0.45706	0.620567	0.539014	0.4118
1120	0.529838	0.340887	0.572088	1.00296	0.740657	0.95926	0.759637											1120	0.386739	0.337131	0.249706	0.361702	0.668918	0.48689	0.559617	0.45706	0.621995	0.543721	0.415739
1125	0.531771	0.343087	0.573061	0.984686	0.737033	0.937556	0.757937											1125	0.394993	0.33841	0.251276	0.357565	0.670553	0.488891	0.559851	0.457506	0.623185	0.543225	0.419374
1130	0.483933	0.286107	0.536348	0.713595	0.535674	0.494396	0.696712											1130	0.401691	0.340851	0.256282	0.358304	0.676241	0.493695	0.561135	0.458175	0.630802	0.545455	0.425585
1135	0.4518	0.241228	0.499392	0.583826	0.462741	0.378047	0.659014											1135	0.407104	0.341432	0.258441	0.359634	0.67425	0.492894	0.56312	0.45996	0.621995	0.5405	0.42604
1140	0.443827	0.232758	0.497933	0.581945	0.455719	0.372887	0.648243											1140	0.411637	0.340851	0.261779	0.3651	0.676454	0.495396	0.565456	0.463529	0.629136	0.538023	0.4271
1145	0.442377	0.232758	0.492098	0.576303	0.465006	0.36844	0.639739											1145	0.416035	0.343757	0.262367	0.36643	0.681359	0.499099	0.56569	0.461744	0.633421	0.544959	0.429296
1150	0.43827	0.229678	0.491126	0.569855	0.461382	0.365771	0.641723											1150	0.419824	0.34585	0.265999	0.365691	0.679155	0.4998	0.567441	0.466875	0.629612	0.543968	0.43172
1155	0.444793	0.230118	0.492584	0.563407	0.453907	0.363814	0.64059											1155	0.425575	0.346547	0.271496	0.372193	0.685554	0.503102	0.568843	0.466652	0.636039	0.547189	0.433235
1160	0.442377	0.230888	0.48991	0.555078	0.452775	0.36417	0.64144											1160	0.429635	0.348059	0.273753	0.371158	0.689891	0.501701	0.573397	0.465536	0.627946	0.549913	0.435886
1165	0.443102	0.227698	0.487236	0.553735	0.457531	0.360078	0.643707											1165	0.432679	0.348175	0.279054	0.368794	0.688042	0.505805	0.576784	0.468659	0.632945	0.543968	0.438082
1170	0.438995	0.229788	0.489667	0.557496	0.451189	0.361146	0.640306											1170	0.435183	0.349337	0.279348	0.375296	0.689819	0.503903	0.576667	0.47089	0.637467	0.548179	0.439521
1175	0.442136	0.226488	0.483102	0.55266	0.455266	0.364526	0.644558											1175	0.437821	0.3505	0.283078	0.374557	0.691739	0.510108	0.576433	0.463529	0.642228	0.547932	0.439067
1180	0.443344	0.228468	0.484561	0.551316	0.44983	0.361324	0.638039											1180	0.44249	0.355266	0.288771	0.376921	0.697142	0.510809	0.580054	0.464421	0.644608	0.552638	0.440203
1185	0.43682	0.230008	0.488694	0.547555	0.455266	0.359189	0.64144
1190	0.440203	0.227038	0.486749	0.5446	0.451189	0.360434	0.634921
1195	0.433196	0.226598	0.486749	0.5446	0.443262	0.362035	0.642574
1200	0.438753	0.227808	0.483102	0.541376	0.450736	0.361679	0.639456
1205	0.435854	0.227148	0.491612	0.5446	0.448245	0.360434	0.641723
1210	0.444069	0.229348	0.489181	0.549704	0.454134	0.367194	0.649376
1215	0.444793	0.234298	0.497204	0.566362	0.464779	0.365949	0.651077
1220	0.452283	0.237488	0.500365	0.58302	0.468177	0.360434	0.659297
1225	0.452042	0.243428	0.493314	0.60129	0.465459	0.36506	0.661565
1230	0.461464	0.247498	0.50158	0.62144	0.467044	0.362747	0.664399
1235	0.454699	0.249368	0.506686	0.641591	0.470668	0.364882	0.662698
1240	0.456149	0.251567	0.507659	0.660666	0.480861	0.367906	0.660147
1245	0.464363	0.252557	0.510333	0.670876	0.479049	0.36844	0.664399
1250	0.462189	0.251897	0.509847	0.673831	0.478822	0.364348	0.659864
1255	0.460981	0.254427	0.512764	0.689146	0.481767	0.364882	0.655896
1260	0.459048	0.252557	0.512278	0.69022	0.48154	0.368084	0.654478
1265	0.467504	0.253547	0.51398	0.701236	0.481767	0.367017	0.659014
1270	0.463155	0.253657	0.516898	0.709027	0.484032	0.367372	0.656746
1275	0.464122	0.254757	0.5186	0.718431	0.489015	0.371642	0.658163
1280	0.47282	0.257947	0.516898	0.719506	0.48675	0.371642	0.656179
1285	0.467987	0.257397	0.515439	0.72676	0.484938	0.370575	0.658447
1290	0.471612	0.257067	0.517384	0.729178	0.490374	0.372709	0.651927
1295	0.46992	0.258717	0.52249	0.739656	0.492412	0.372887	0.662415
1300	0.470645	0.259817	0.5186	0.744492	0.496489	0.373777	0.653628
1305	0.47137	0.259267	0.519572	0.747179	0.50034	0.376801	0.658447
1310	0.470403	0.258937	0.523705	0.761956	0.496942	0.378225	0.650227
1315	0.474994	0.258827	0.516168	0.759807	0.507814	0.380004	0.65958
1320	0.473061	0.259927	0.520058	0.766792	0.503058	0.381427	0.657029
1325	0.469437	0.261027	0.52249	0.779688	0.505323	0.381961	0.655612
1330	0.47596	0.261357	0.52176	0.782644	0.514383	0.38623	0.653345
1335	0.480068	0.261687	0.517627	0.789092	0.513703	0.391745	0.656746
1340	0.476685	0.261687	0.525407	0.785599	0.511665	0.393346	0.652778
1345	0.476202	0.263227	0.521517	0.797958	0.515515	0.393346	0.654762
1350	0.477168	0.262457	0.520788	0.808168	0.522763	0.399217	0.651927
1355	0.47741	0.264877	0.522733	0.810586	0.521857	0.398328	0.655612
1360	0.481517	0.263777	0.529297	0.810586	0.52231	0.398684	0.651361
1365	0.480068	0.264987	0.523948	0.815153	0.527746	0.407401	0.657313
1370	0.482242	0.267077	0.525894	0.818646	0.537939	0.408112	0.651927
1375	0.481517	0.265097	0.5186	0.827781	0.536806	0.414517	0.651361
1380	0.482	0.270487	0.524435	0.840677	0.54043	0.414339	0.653345
1385	0.483209	0.269717	0.522247	0.834229	0.548584	0.421811	0.650227
1390	0.481034	0.270047	0.527109	0.845244	0.547678	0.427326	0.661281
1395	0.486349	0.269277	0.523219	0.855991	0.553567	0.434264	0.657313
1400	0.487799	0.268177	0.524192	0.850887	0.552888	0.440135	0.655896
1405	0.485141	0.270047	0.533431	0.858141	0.549717	0.44227	0.653061
1410	0.487557	0.271257	0.528082	0.860559	0.55402	0.448675	0.653345
