# Supplementary material for: Structural motifs for subtype-specific pH-sensitive gating of vertebrate otopetrin proton channels
Source: eLife. 2022 Aug 3;11:e77946. doi: 10.7554/eLife.77946 (PMC9348849; doi:10.7554/eLife.77946)
Supplement: Figure 4—source data 1. [file elife-77946-fig4-data1.xlsx]

## Sheet: Figure 4B
OTOP channels time constant
Tau-on
OTOP1	OTOP2	OTOP3
100.5	20.87	1059
129.8	11.17	1401
183.1	19.18	930
170.5	11.66	899
159.1	12.5	1292
113.4		1007
Tau-off
OTOP1	OTOP2	OTOP3
15.9	31.65	10.29
10.67	28.76	24.32
39.24	26.26	20.28
21.46	16.74	10.88
12.83	18.44	15.95
11.69	19.91	23.27

## Sheet: Figure 4D
OTOP1 time constant as a function of pH
Tau-on					Tau-off
	pH					pH
Cell #	6	5.5	5		Cell #	6	5.5	5
1	160.04	100.5	75.68		1	16.05	15.9	12.71
2	185.04	129.8	88.93		2	18.83	10.67	10.76
3	183.1	130.3	125		3	41.68	39.24	22.59
4	231.9	170.5	106.3		4	20.45	21.46	12.68
5	189.1	159.1	88.9		5	20.16	12.83	11.68
6	114.4	113.4	86.87		6	17.75	11.69	8.972
OTOP2 time constant as a function of pH
Tau-on					Tau-off
	pH					pH
Cell #	6	5.5	5		Cell #	6	5.5	5
1	29.89	20.87	21.75		1	26.69	31.65	30.95
2	9.97	11.17	14.44		2	21.92	28.76	23.06
3	18.43	19.18	28.01		3	23.55	26.26	13.7
4	19.77	11.66	21.32		4	11.13	16.74	19.5
5	22.54	12.5	16.43		5	32	18.44	21
					6	27.32	19.91	24
OTOP3 time constant as a function of pH
Tau-on					Tau-off
	pH					pH
Cell #	5.5	5			Cell #	5.5	5
1	1059	579			1	10.29	16.15
2	1401	899			2	24.32	18
3	930	612			3	20.28	13.12
4	899	581			4	10.88	13.61
5	1292	604			5	15.95	10.61
6	1007	561			6	23.27	17
KIR2.1 time constant in response to 50 K+
Cell #	Tau-on	Tau-off
1	44.14	35.47
2	32.85	24.5
3	36.22	30.81
4	33.89	37.79
5	31.62	22.44
6	18	17.9
7	19.29	20.33
8	18.37	30.91
9	25.57	20.05
10	36.61	9.228
11	18.33	7.802
12	14.93	7.063
13	9.522	7.098
