# Supplementary material for: Structural motifs for subtype-specific pH-sensitive gating of vertebrate otopetrin proton channels
Source: eLife. 2022 Aug 3;11:e77946. doi: 10.7554/eLife.77946 (PMC9348849; doi:10.7554/eLife.77946)
Supplement: Figure 5—figure supplement 1—source data 1. [file elife-77946-fig5-figsupp1-data1.xlsx]

## Sheet: F5_S1_B
Reversal potentials of OTOP channels as a function of time
OTOP1
pH 5.0	Time
Cell #	1	2	3	4
1	85.67	52.87	31.27	18.27
2	70.11	42.67	23.27	11.07
3	72.47	64.47	64.47	63.67
4	78.27	60.47	44.87	32.47
5	93.27	84.67	73.87	61.67
OTOP2
pH 5.0	Time
Cell #	1	2	3	4
1	39.07	28.87	24.27
2	5.07
3	35.07	18.07	14.27	11.07
4	41.87	28.67	22.47	18.87
5	36.67	9.87	4.47	0.07
OTOP3
pH5.0	Time
Cell #	1	2	3	4
1	-13.53	8.87	15.67	20.47
2	-10.13	2.1	11.47	14.67
3	72.47	80.33	78.07	78.67
4	77.27	81.33	82.33	78.27
5	63.27	67.87	67.07	67.67
6	30.87	41.47	46.47	47.07
7	51.87	57.47	58.87	58.27

## Sheet: F5_S1_C
Current (predicted) vs Current (measured)
OTOP1
Predicted	Time					Measured	Time
Cell #	1	2	3	4		Cell #	1	2	3	4
1	-1182.71	-948.551	-794.35	-701.544		1	-1182.71	-897.217	-687.561	-558.777
2	-814.514	-665.622	-560.355	-494.156		2	-814.514	-675.659	-524.445	-426.941
3	-264.435	-250.56	-250.56	-249.173		3	-264.435	-299.683	-300.903	-293.121
4	-1093.44	-970.469	-862.693	-777.025		4	-1093.44	-972.595	-818.024	-715.027
5	-986.023	-937.083	-875.624	-806.198		5	-986.023	-1025.54	-904.083	-761.414
