# Supplementary material for: Structural motifs for subtype-specific pH-sensitive gating of vertebrate otopetrin proton channels
Source: eLife. 2022 Aug 3;11:e77946. doi: 10.7554/eLife.77946 (PMC9348849; doi:10.7554/eLife.77946)
Supplement: Figure 5—source data 1. [file elife-77946-fig5-data1.xlsx]

## Sheet: Figure 5C
OTOP1 conductance (nS)
	pH
Cell #	10	9	8	7.5	7	6	5
1	2.81225	2.65194	1.20139	0.670228	0.535023	1.91218	7.7955
2	0.817021	1.65529	0.650913	0.249163	0.20667	1.19753	5.7037
3	0.363121	0.291655	0.197012	0.154519	0.135204	0.363121	1.57803
4	2.12078	2.85861	1.51236	0.803501	0.701132	2.10533	7.22958
5	0.610352	1.05653	0.614215	0.289724	0.262683	1.04301	5.97024
OTOP2 conductance (nS)
	pH
Cell #	10	9	8	7.5	7	6	5
1	7.41017	5.78385		3.99529
2	11.0076	6.94951	2.87985	2.08408	1.69102	2.02324	2.76879
3	3.69591	3.29609	1.75669	1.15793	0.923253	0.833439	1.06908
4	8.36529	5.05954	3.1773	2.72534	2.36898	2.81612	3.778
5	3.57423	1.69875	1.015	0.840199	0.673125	0.745556	1.25933
6	12.9178	12.4794	10.0061	7.57724	5.95576	5.00836	5.92582
7	10.966	10.3943	7.49129	6.12186	4.90792	4.13146	6.11414
OTOP3 conductance (nS)
	pH
Cell #	10	9	8	7.5	7	6	5
1	0.408579	0.323378	0.348551	0.30595	0.280777	0.253668	1.08632
2	0.073583	0.0793922	0.0948833	0.0890742	0.0852014	0.0716466	1.19476
3	0.234304	0.106502	0.0600282	0.0464735	0.0813286	0.073583	2.06807
4		0.189767	0.0948833	0.0697102	0.083265	0.0852014	3.37901
5	0.0503463	0.0948833	0.0774558	0.0716466	0.0503463	0.0774558	2.86199
6		0.063901	0.104565	0.0522827	0.0561554	0.0619646	1.21799
7	0.642883	0.501526	0.455053	0.466671	0.418261	0.426007	3.37514
