# Supplementary material for: Structural motifs for subtype-specific pH-sensitive gating of vertebrate otopetrin proton channels
Source: eLife. 2022 Aug 3;11:e77946. doi: 10.7554/eLife.77946 (PMC9348849; doi:10.7554/eLife.77946)
Supplement: Figure 6—source data 1. [file elife-77946-fig6-data1.xlsx]

## Sheet: Figure 6B and D
OTOP2 and O2_O3_Chimeras currents
OTOP2 current
	pH
Cell #	10	9	8	7	6	5
1	263.7	157.5	54	10.1	-70.4	-140.8
2	97	45.8	17.4	2.1	-63.2	-100.4
3	67.4	33.3	13.1	4.9	-49.4	-81.5
4	91.4	38.9	22.6	-8.3	-86.8	-109.4
O2_O3_L1-2
	pH
Cell #	10	9	8	7	6	5
1	30.5	11.9	0.8	-3.4	-14.8	-34.9
2	6.7	4.4	1.1	-0.3	-10.8	-19.8
3	9	6.6	2.7	-1.5	-11.4	-17.9
4	18.3	8.9	6	-0.9	-33	-61.6
5	12.2	8.2	7.5	-0.8	-29.4	-46.5
O2_O3_L3-4
	pH
Cell #	10	9	8	7	6	5
1	7.6	3.7	1.7	-0.2	-7.5	-25.5
2	3.1	2.6	0.6	-0.2	-3.4	-8.9
3	12.8	2.7	0.5	0	-9.1	-14.8
4	6.7	2	0.6	-0.1	-4.4	-9.5
O2_O3_L5-6
	pH
Cell #	10	9	8	7	6	5
1	-52	-44	-60
2	27.9	10.5	3.4	-2.9	-41.4	-127.1
3	40.6	16.6	6.3	-3.4	-49.4	-130.4
4	46.8	18.6	5.2	-3.5	-49	-134.1
5	54.6	22.9	8.1	-4.4	-60.1	-189.2
O2_O3_L5-6
	pH
Cell #	10	9	8	7	6	5
1	-52	-44	-60
2	27.9	10.5	3.4	-2.9	-41.4	-127.1
3	40.6	16.6	6.3	-3.4	-49.4	-130.4
4	46.8	18.6	5.2	-3.5	-49	-134.1
5	54.6	22.9	8.1	-4.4	-60.1	-189.2
O2_O3_L7-8
	pH
Cell #	10	9	8	7	6	5
1	42	23.7	11.1	-1.8	-36.6	-63
2	54.9	20	6	-3.5	-25.3	-37.7
3	14.8	6.6	2	-0.3	-16.9	-22.3
4		18.5	12.7	-1.1	-25.2	-42.3
O2_O3_L9-10
	pH
Cell #	10	9	8	7	6	5
1	3.5	0.9	4	-2	-5.8	-13.1
2	2.7	3.2	0.2	0.5	-7	-12.1
3	4.3	1.5	0.9	-4.3	-5.2	-9.3
4	2.3	1.8	2	-1.2	-1.4	-4
5	1.7		0.6	-0.2	-0.1	-5.5
O2_O3_L11-12
	pH
Cell #	10	9	8	7	6	5
1					-31.1	-38.5
2					-36.3	-54.9
3					-34.5	-76
4					-50.7	-98
5					-37	-71.7
6					-47	-59.8
7	131.2
8	66.5	41.8	16.2	7	-72	-110.5
9	70.2	42.4	13.1	1.2	-74.8	-116.9
10	72.9	40.6	9	-7
11	43.9	29.6	5.5	-4.9	-38.1	-54.9
12	68.4	46.7	8.9	-3.1	-34.8	-51.3

## Sheet: Figure 6C and E
OTOP2 and O2_O3 chimeras, normalized currents (norm to pH5)
WT_OTOP2				O2_O3_L1-2				O2_O3_L5.6
	pH				pH				pH
Cell #	10	6		Cell #	10	6		Cell #	10	6
1	-1.87287	0.5		1	-0.87393	0.424069		1	-0.219512	0.325728
2	-0.96614	0.629482		2	-0.33838	0.545455		2	-0.31135	0.378834
3	-0.82699	0.606135		3	-0.50279	0.636872		3	-0.348993	0.365399
4	-0.83547	0.793419		4	-0.29708	0.535714		4	-0.288584	0.317653
				5	-0.26237	0.632258
O2_O3_L7-8				O2_O3_L11-12
	pH				pH
Cell #	10	6		Cell #	10	6
1	-0.66667	0.580952		1	-0.60181	0.651584
2	-1.45623	0.671088		2	-0.60051	0.639863
3	-0.66368	0.757848		3	-0.7421	0.59401
4	-1.22341	0.595745		4	-0.79964	0.693989
				5	-0.92399	0.500745
				6	-1.33333	0.678363

## Sheet: Figure 6G and I
OTOP3 and O3_O2_Chimeras currents
OTOP3 current
	pH
Cell #	10	9	8	7	6	5
1	-0.8	-0.5	-0.3	-1.4	-0.8	-448.9
2	-0.3	-1.1	-1	-0.6	-3.7	-717.4
3	0.8	0.8	-0.3	0	-1.5	-629.5
4	8	5	2		-5.8	-629.9
5	7	6	3		-11	-639
O3_O2_L1-2
	pH
Cell #	10	9	8	7	6	5
1	-6.9	1.1	0.2	1.7	-2.4	-10.8
2	1.5	0.5	3.2	-2.9	-7.5	-8.7
3	0.9	1.5	1.4	0.9	-3.4	-11.7
O3_O2_L3-4
	pH
Cell #	10	9	8	7	6	5
1	32.2	25.5	13	-14.3	-139.2	-452.9
2	50.5	37.2	20.8	-18.5	-219.7	-795.6
3	32	25.8	15.1	-17	-135.2	-525.2
4	43.9	31.4	17.2	-15.4		-358.7
O3_O2_L5-6
	pH
Cell #	10	9	8	7	6	5
1	9.8	4.4	0.5	-5.3	-139.8	-352.2
2	2.6	3.7	3.1	-2.1	-107.9	-296.3
3	3.7	1.4	0.9	-3.2	-87.3	-200.8
4	2.9	0.8	1.1	-3.4	-52.8	-154.6
O3_O2_L7-8
	pH
Cell #	10	9	8	7	6	5
1	6.7	1.2	0.3	-0.9	-36.8	-1174.8
2	5.2	0.3	-0.3	0.6	-63.9	-978.9
3	2.9	0.9	0.5	-2.7	-18.6	-948.2
4	7.8	2.2	4.6	3.5	-16	-1127.5
5	3.2	1.4	1.4	0.7	-28.8	-920.2
O3_O2_L9-10
	pH
Cell #	10	9	8	7	6	5
1	5.6	2.6	4.3	-2.9	-29.3	-1324.5
2	4.3	-1.4	-1.7	1.2	-42.7	-1619.6
3	5.6	2.6	1.5	1.1	-61	-1961.1
4	1.7	0.8	1.7	-1.7	-76.1	-1455.4
5	7.3	0.2	0.1	-0.9	-50.5	-1225.4
O3_O2_L11-12
	pH
Cell #	10	9	8	7	6	5
1	7	2.4	1.2	-2	-40.6	-488.9
2	3.7	2.4	2.4	-1.5	-87.9	-788.9
3	2.8	2.7	3.6	-1.5	-80.9	-650
4	5.8	3.1	0.9	-4.3	-140.7	-992.7
5					-57.4	-454.4
6					-64.7	-624

## Sheet: Figure 6H and J
OTOP3 and O3_O2 chimeras, normalized currents (norm to pH5)
WT_OTOP3				O3_O2_L3-4				O3_O2_L5-6
	pH				pH				pH
Cell #	10	6		Cell #	10	6		Cell #	10	6
1	0.001782	0.001782		1	-0.0710974	0.307353		1	-0.02783	0.396934
2	0.000418	0.005158		2	-0.0634741	0.276144		2	-0.00877	0.364158
3	-0.00127	0.002383		3	-0.0609292	0.257426		3	-0.01843	0.434761
4	-0.0127	0.009208		4	-0.122386			4	-0.01876	0.341527
5	-0.01095	0.017214
O3_O2_L7-8				O3_O2_L9-10				O3_O2_L11-12
	pH				pH				pH
Cell #	10	6		Cell #	10	6		Cell #	10	6
1	-0.0057	0.031324		1	-0.00423	0.022122		1	-0.01122	0.141735
2	-0.00531	0.065277		2	-0.00265	0.026365		2	-0.00757	0.12632
3	-0.00306	0.019616		3	-0.00286	0.031105		3	-0.00355	0.103686
4	-0.00692	0.014191		4	-0.00117	0.052288		4	-0.00892	0.083044
5	-0.00348	0.031298		5	-0.00596	0.041211		5		0.111421
								6		0.124462
