# Supplementary material for: Structural motifs for subtype-specific pH-sensitive gating of vertebrate otopetrin proton channels
Source: eLife. 2022 Aug 3;11:e77946. doi: 10.7554/eLife.77946 (PMC9348849; doi:10.7554/eLife.77946)
Supplement: Figure 7—source data 1. [file elife-77946-fig7-data1.xlsx]

## Sheet: Figure 7A -- D
Note: Figure 7E and F uses the same data from figure 7A -- D, but presented in a different format.
OTOP2 and O2_O3 chimeras, time constant
OTOP2					O2_O3_L1-2					O2_O3_L5-6					O2_O3_L7-8					O2_O3_L11-12
	pH					pH					pH					pH					pH
Cell #	6	5.5	5		Cell #	6	5.5	5		Cell #	6	5.5	5		Cell #	6	5.5	5		Cell #	6	5.5	5
1	30	17	19		1	32	31	28		1	13	12.5	11		1	21.5	9	9.4		1	34	19	20
2	24	26	18		2	28	34	24		2	21	12	10		2	25.8	21.8	20.6		2	26	12	13
3	15	19	11		3	21.8113	18.4601	10.6417		3	24.6	13			3	26.7	26.8	16.2		3	20	11	11
4	18.32	21.11	16.56		4	23.6239	25.3562	20.0198		4	26		16.1
OTOP3 and O3_O2 chimeras, time constant
OTOP3					O3_O2_L3-4					O3_O2_L5-6					O3_O2_L7-8					O3_O2_L9-10					O3_O2_L11-12
	pH					pH					pH					pH					pH					pH
Cell #	5.5	5			Cell #	5.5	5			Cell #	5.5	5			Cell #	5.5	5			Cell #	5.5	5			Cell #	5.5	5
1	2162.37	1079.68			1	12	15			1	833	640			1	1922	428			1	894	449			1	406.122	228.175
2	2567.56	780.237			2	9				2	663	633			2	1720	402.6			2	2166	468			2	573.157	212.893
3	1992	904			3	14	9			3	383	393			3	1294	357.8			3	862.89	208.4			3	592.878	311.78
					4	17	11			4	74.5	269			4	2268	462			4	734	183			4	460.433	202.731
